# Supplementary material
Source: PubMed Central journal article supplement (PMC2424150)
Supplement: blood-2007-10-117150_1.pdf [file blood-2007-10-117150_1.pdf]

The **Childhood Cancer Survivor Study (CCSS)** is a collaborative, multi-institutional project, funded as a resource by the National Cancer Institute, of individuals who survived five or more years after diagnosis of childhood cancer. **CCSS** is a retrospectively ascertained cohort of 20,346 childhood cancer survivors diagnosed before age 21 between 1970 and 1986 and approximately 4,000 siblings of survivors, who serve as a control group. The cohort was assembled through the efforts of 26 participating clinical research centers in the United States and Canada. The study is currently funded by a U24 resource grant (NCI grant # U24 CA55727) awarded to St. Jude Children's Research Hospital. Currently, we are in the process of expanding the cohort to include an additional 14,000 childhood cancer survivors diagnosed before age 21 between 1987 and 1999. For information on how to access and utilize the CCSS resource, visit [www.stjude.org/ccss](http://www.stjude.org/ccss).

#### CCSS Institutions and Investigators

|                                                                           |                                                                                                                                                     |
|---------------------------------------------------------------------------|-----------------------------------------------------------------------------------------------------------------------------------------------------|
| St. Jude Children's Research Hospital, Memphis, TN                        | Leslie L. Robison, Ph.D. <sup>#†</sup> , Melissa Hudson, M.D. <sup>**</sup><br>Greg Armstrong, M.D. <sup>‡</sup>                                    |
| Children's Healthcare of Atlanta/Emory University<br>Atlanta, GA          | Lillian Meacham, M.D. <sup>*</sup> , Ann Mertens, Ph.D. <sup>‡</sup>                                                                                |
| Children's Hospitals and Clinics of Minnesota Minneapolis<br>St. Paul, MN | Joanna Perkins, M.D. <sup>*</sup> , Maura O'Leary, M.D. <sup>†</sup>                                                                                |
| Children's Hospital and Medical Center, Seattle, WA                       | Debra Friedman, M.D., MPH <sup>*</sup> , Thomas Pendergrass, M.D. <sup>†</sup>                                                                      |
| Children's Hospital, Denver, CO                                           | Brian Greffe, M.D. <sup>*</sup> , Lorrie Odom, M.D. <sup>†</sup>                                                                                    |
| Children's Hospital Los Angeles, CA                                       | Kathy Ruccione, RN, MPH <sup>*</sup>                                                                                                                |
| Children's Hospital, Oklahoma City, OK                                    | John Mulvihill, M.D. <sup>‡</sup>                                                                                                                   |
| Children's Hospital of Philadelphia, PA                                   | Jill Ginsberg, M.D. <sup>*</sup> , Anna Meadows, M.D. <sup>‡</sup>                                                                                  |
| Children's Hospital of Pittsburgh, PA                                     | Jean Tersak, M.D. <sup>*</sup> , A. Kim Ritchey, M.D. <sup>†</sup> ,<br>Julie Blatt, M.D. <sup>†</sup>                                              |
| Children's National Medical Center, Washington, DC                        | Gregory Reaman, M.D. <sup>*</sup> , Roger Packer, M.D. <sup>‡</sup>                                                                                 |
| Cincinnati Children's Hospital Medical Center                             | Stella Davies, M.D., Ph.D. <sup>‡</sup>                                                                                                             |
| City of Hope- Los Angeles, CA                                             | Smita Bhatia, M.D.                                                                                                                                  |
| Dana-Farber Cancer Institute/Childrens Hospital<br>Boston, MA             | Lisa Diller, M.D. <sup>*</sup> , Holcombe Grier, M.D. <sup>†</sup> ,<br>Frederick Li, M.D. <sup>§</sup>                                             |
| Fred Hutchinson Cancer Research Center, Seattle, WA                       | Wendy Leisenring, Sc.D. <sup>**</sup> , John Potter, M.D., Ph.D. <sup>†‡</sup>                                                                      |
| Hospital for Sick Children, Toronto, ON                                   | Mark Greenberg, MBChB. <sup>*</sup> , Paul C. Nathan, M.D. <sup>†</sup>                                                                             |
| International Epidemiology Institute, Rockville, MD                       | John Boice, Sc.D. <sup>‡</sup>                                                                                                                      |
| Mayo Clinic, Rochester, MN                                                | Vilmarie Rodriguez, M.D. <sup>*</sup> , W. Anthony Smithson, M.D. <sup>†</sup> ,<br>Gerald Gilchrist, M.D. <sup>†</sup>                             |
| Memorial Sloan-Kettering Cancer Center New York                           | Charles Sklar, M.D. <sup>**</sup> , Kevin Oeffinger, M.D. <sup>‡</sup>                                                                              |
| Miller Children's Hospital                                                | Jerry Finklestein, MD <sup>†</sup>                                                                                                                  |
| National Cancer Institute, Bethesda, MD                                   | Barry Anderson, M.D. <sup>†</sup> , Peter Inskip, Sc.D. <sup>‡</sup>                                                                                |
| Nationwide Children's Hospital, Columbus, Ohio                            | Amanda Termuhlen, M.D. <sup>*</sup> , Frederick Ruymann, M.D. <sup>†</sup> ,<br>Stephen Qualman, M.D. <sup>‡</sup> , Sue Hammond, M.D. <sup>‡</sup> |
| Riley Hospital for Children, Indianapolis, IN                             | Terry A. Vik, M.D. <sup>*</sup> , Robert Weetman, M.D. <sup>†</sup>                                                                                 |
| Roswell Park Cancer Institute, Buffalo, NY                                | Daniel M. Green, M.D. <sup>**</sup>                                                                                                                 |
| St. Louis Children's Hospital, MO                                         | Robert Hayashi, M.D. <sup>*</sup> , Teresa Vietti, M.D. <sup>†</sup>                                                                                |
| Stanford University School of Medicine, Stanford, CA                      | Neyssa Marina, M.D. <sup>*</sup> , Sarah S. Donaldson, M.D. <sup>‡</sup> ,<br>Michael P. Link, M.D. <sup>†</sup>                                    |
| Texas Children's Hospital, Houston, TX                                    | Zoann Dreyer, M.D. <sup>*</sup>                                                                                                                     |
| University of Alabama, Birmingham, AL                                     | Kimberly Whelan, M.D., MSPH <sup>*</sup> , Jane Sande, M.D. <sup>†</sup> ,<br>Roger Berkow, M.D. <sup>†</sup>                                       |
| University of Alberta, Edmonton, AB                                       | Yutaka Yasui, Ph.D. <sup>‡</sup>                                                                                                                    |
| University of California-Los Angeles, CA                                  | Jacqueline Casillas, MD MSHS <sup>*</sup> , Lonnie Zeltzer, M.D. <sup>†‡</sup>                                                                      |
| University of Michigan, Ann Arbor, MI                                     | University of California-San Francisco, CA Robert Goldsby,<br>M.D. <sup>*</sup> , Arthur Ablin, M.D. <sup>†</sup>                                   |
| University of Minnesota, Minneapolis, MN                                  | Raymond Hutchinson, M.D. <sup>*</sup>                                                                                                               |
| University of Southern California                                         | Joseph Neglia, M.D., MPH <sup>‡*</sup> ,                                                                                                            |
| University of Washington, Seattle, WA                                     | Dennis Deapen, Dr. P.H. <sup>‡</sup>                                                                                                                |
| UT-Southwestern Medical Center at Dallas, TX                              | Norman Breslow, Ph.D. <sup>‡</sup>                                                                                                                  |
|                                                                           | Dan Bowers, M.D. <sup>*</sup> , Gail Tomlinson, M.D. <sup>†</sup> ,                                                                                 |
|                                                                           | George R. Buchanan, M.D. <sup>†</sup>                                                                                                               |
| <b>U.T.M.D. Anderson Cancer Center, Houston, TX</b>                       | <b>Louise Strong, M.D.<sup>**</sup>, Marilyn Stovall, MPH, Ph.D.</b>                                                                                |

<sup>‡</sup> Institutional Principal Investigator

<sup>†</sup> Former Institutional Principal Investigator

<sup>§</sup> Former Member CCSS Steering Committee

<sup>#</sup> Project Principal Investigator (U24 CA55727)
